# Supplementary material for: Influence of electroosmotic flow on the ionic current rectification in a pH-regulated, conical nanopore
Source: Royal Society of Chemistry journal article supplement (doi:10.1039/c5nr03433g), 2015-01-01
Supplement: c5nr03433g1.pdf [file c5nr03433g1.pdf]

**Electronic Supplementary Information (ESI)**  
**Influence of Electroosmotic Flow on the Ionic Current Rectification in a pH-Regulated, Conical Nanopore**

Dong-Huei Lin,<sup>a</sup> Chih-Yuan Lin,<sup>b</sup> Shiojenn Tseng<sup>\*,c</sup> and Jyh-Ping Hsu<sup>\*,a,b</sup>

<sup>a</sup>Institute of Polymer Science and Engineering, National Taiwan University, Taipei, Taiwan 10617

<sup>b</sup>Department of Chemical Engineering, National Taiwan University, Taipei, Taiwan 10617

<sup>c</sup>Department of Mathematics, Tamkang University, New Taipei City, Taiwan 25137

Tel: 886-2-23637448, Fax: 886-2-23623040, E-mail: jphsu@ntu.edu.tw

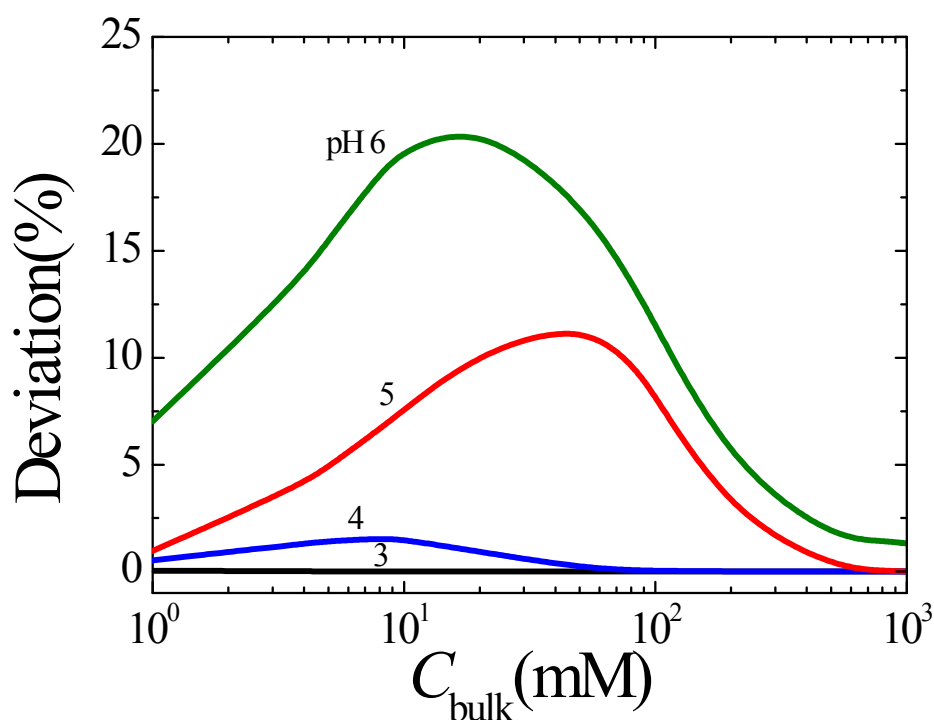

**Fig. S1** Percentage deviation in RF due to neglecting EOF with  $C_{\text{bulk}}$  for various levels of pH.
